# Supplementary material
Source: Springer Nature journal article supplement (https://www.springermedizin.de/resource/supplementary/12894_2013_286_MOESM2_ESM.pdf/9513376)

**A**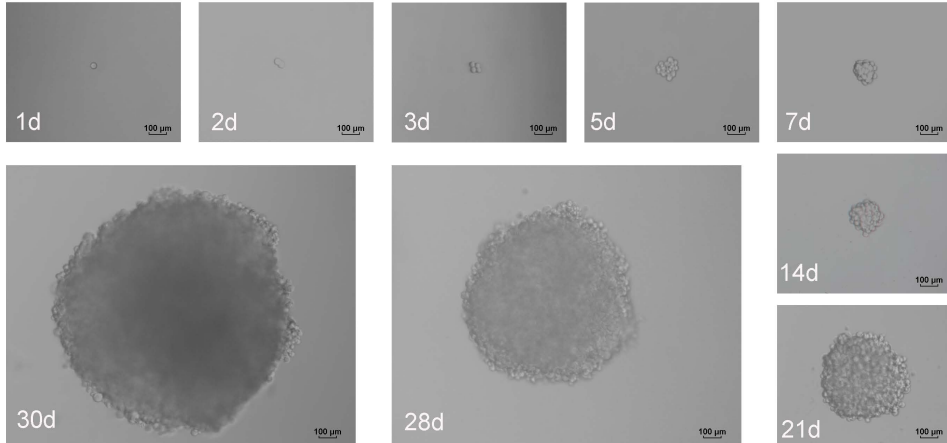**B**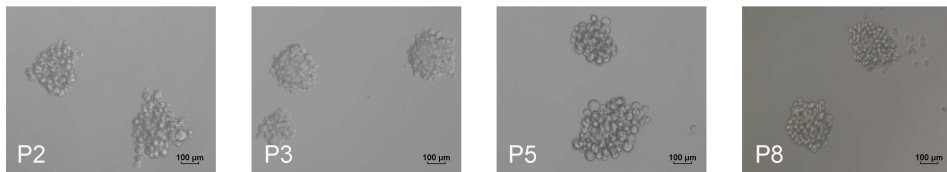**C**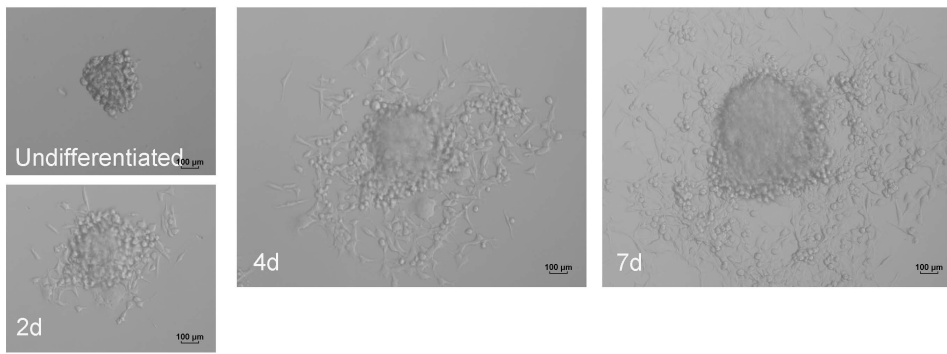

Supplement: MOESM2 [file 9513376]
